# Supplementary material for: A scalable synthesis of N-doped Si nanoparticles for high-performance Li-ion batteries
Source: Royal Society of Chemistry journal article supplement (doi:10.1039/c6cc00253f), 2016-01-01
Supplement: c6cc00253f1.pdf [file c6cc00253f1.pdf]

## Supporting information

### Scalable synthesis of N-doped Si nanoparticles for high-performance Li-ion batteries

*Ying Han,<sup>‡</sup> Ning Lin,<sup>‡</sup> Yuying Qian,<sup>‡</sup> Jianbin Zhou,<sup>‡</sup> Jie Tian,<sup>‡</sup> Yongchun Zhu,<sup>\*,‡</sup> and Yitai Qian<sup>\*,‡</sup>*

<sup>‡</sup> Department of Chemistry and Hefei National Laboratory for Physical Science at Microscale,  
University of Science and Technology of China, Hefei, Anhui 230026, PR China

Corresponding author: Yongchun Zhu, E-mail: ychzhu@ustc.edu.cn;

Yitai Qian, E-mail: yitaiqian@ustc.edu.cn

#### Experimental section

All the reagents used here are of analytical grade without further purification. Mg powder and commercial Si powder were purchased from Sinopharm Chemical Reagent Co. Ltd.

**Structural Characterization:** The structure and morphology of the samples were characterized by X-ray diffractometer (Philips X' Pert Super diffract meter with Cu K $\alpha$  radiation ( $\lambda=1.54178$  Å)), Raman spectrometer (Lab-RAM HR UV/VIS/NIR), X-rayphotoelectron spectroscopy (XPS) (ESCA-Lab MKII X-ray photoelectron spectrometer), scanning electron

microscopy (SEM, JEOL-JSM-6700F), transmission electron microscopy (TEM, Hitachi H7650 and HRTEM, JEOL 2010), and atomic resolution analytical microscope (JEM-ARM200F).

***Electrochemical Measurement:*** The electrochemical properties of the commercial Si (200 mesh) and the as-prepared N-doped Si nanoparticles were evaluated through coin-type half cells (2016 R-type) which were assembled under an argon-filled glove box ( $\text{H}_2\text{O}$ ,  $\text{O}_2 < 1$  ppm). Metallic Li sheet was used as counter and reference electrode. 1 M  $\text{LiPF}_6$  in a mixture of ethylene carbonate/dimethylcarbonate (EC/DMC; 1:1 by volume) was served as the electrolyte (Zhuhai Smoothway Electronic Materials Co., Ltd (China)). For preparing working electrode, the slurry mixed with as-prepared active material, carbon black (super P) and sodium carboxymethyl cellulose (CMC) binder in a weight ratio of 6:2:2 in water solvent was pasted onto a Cu foil and then dried in a vacuum oven at 80 °C for 10 h. The active material density of each electrode was determined to be about 0.8 mg  $\text{cm}^{-2}$ . Galvanostatic measurements were conducted using a LAND-CT2001A instrument with a fixed voltage range of 0.015–1.5 V (vs.  $\text{Li/Li}^+$ ) at room temperature. Electrochemical impedance spectroscopy (EIS) was performed on electrochemical workstation (CHI660D), with an alternating current (AC) voltage of 5 mV in the frequency range from 100 kHz to 0.1 Hz.

**Table S1 Three repeated enlarged experiments of N-doped Si nanoparticles and corresponding conversion yields.**

|   | Commercial<br>Bulk Si | Intermediate<br>$\text{Mg}_2\text{Si}$ | N-doped Si<br>nanoparticles | Yield |
|---|-----------------------|----------------------------------------|-----------------------------|-------|
| 1 | 25.000g               | 67.278g                                | 23.807g                     | 95.2% |
| 2 | 25.000g               | 67.615g                                | 24.578g                     | 98.3% |
| 3 | 25.000g               | 67.321g                                | 24.329g                     | 97.3% |

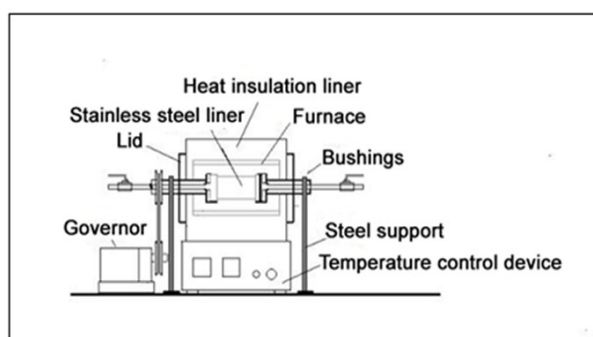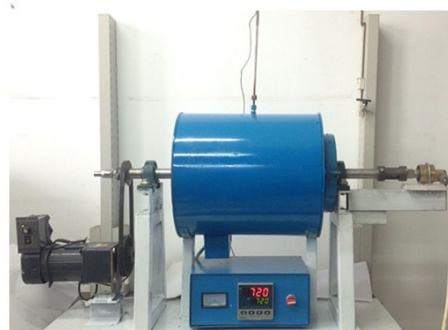

**Fig. S1. The scheme and photo of the self-designed reaction vessel.**

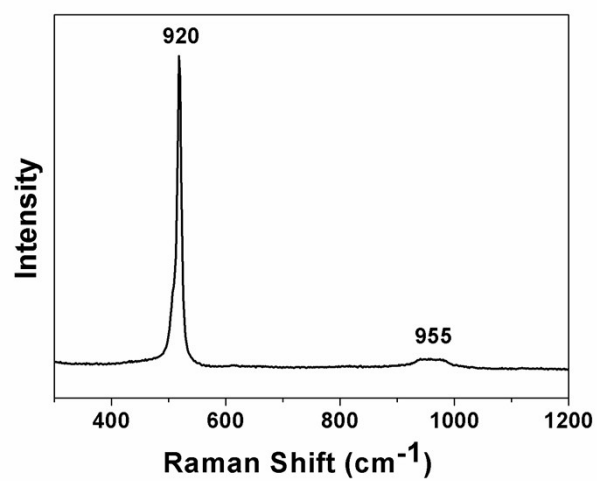

Fig. S2. Raman spectrum of the commercial Si.

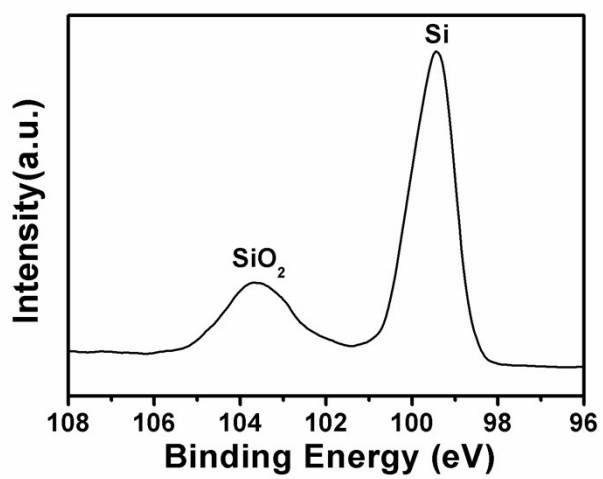

Fig. S3. XPS spectrum of the commercial Si.

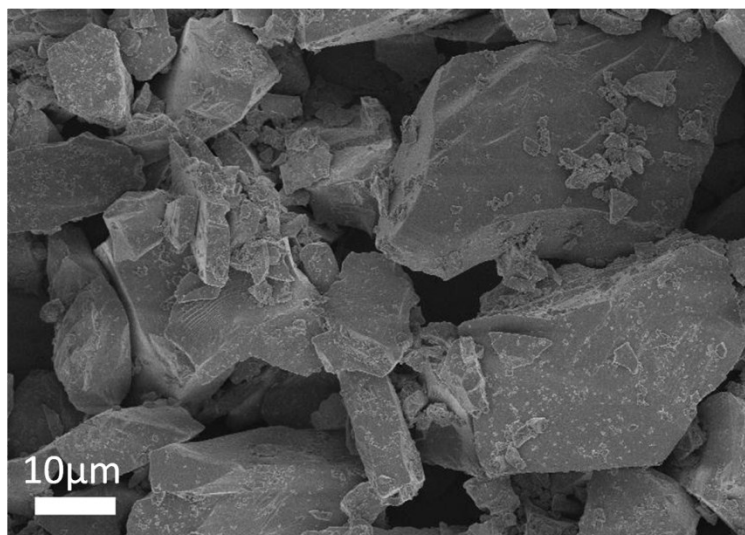

**Fig. S4. SEM of the commercial Si.**

The origin Si (200 mesh) is commercial available, and the particles size is about few micrometers (shown in Fig. S4).

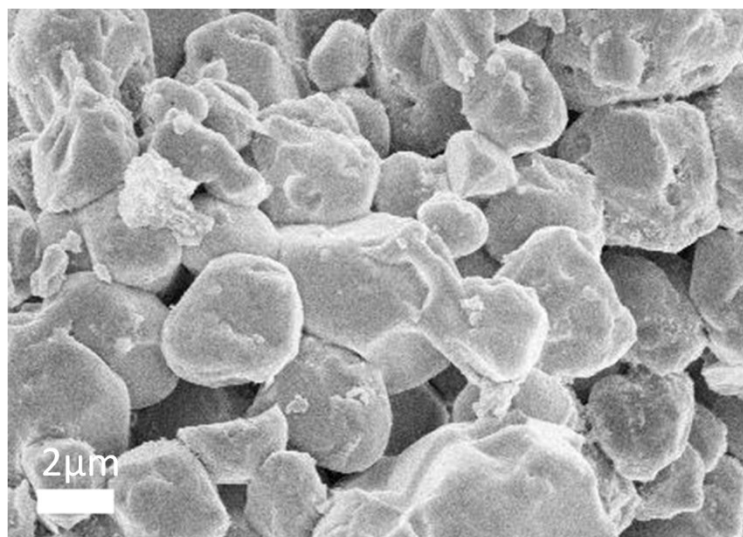

**Fig. S5. SEM of the intermediate  $\text{Mg}_2\text{Si}$ .**

As shown in Fig. S5, the particles size of  $\text{Mg}_2\text{Si}$  becomes smaller than that of the commercial Si.

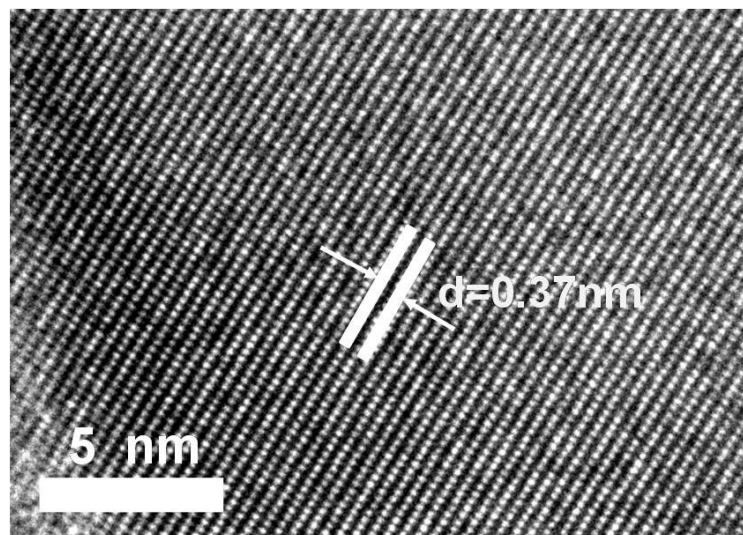

**Fig. S6.** HRTEM of the intermediate  $\text{Mg}_2\text{Si}$ .

The HRTEM picture shows that the interplanar distance of  $\text{Mg}_2\text{Si}$  is about 0.37 nm (shown in Fig. S6), corresponding to the (111) crystal planes of the cubic phase.

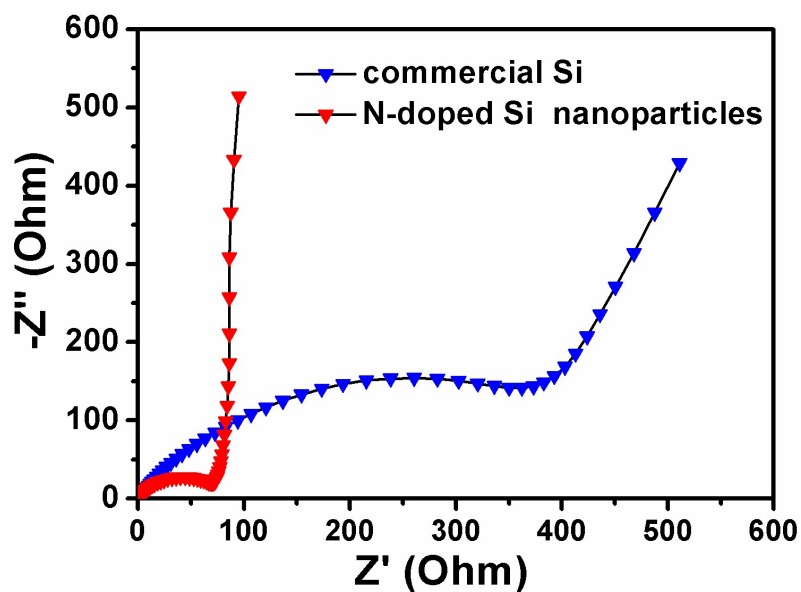

**Fig. S7.** Nyquist plots of the commercial Si and N-doped Si nanoparticles electrodes

The electrochemical impedance spectrum (EIS) is used to investigate the charge transport kinetics for the electrochemical properties of commercial Si and N-doped Si nanoparticles

electrodes. Fig. S7 shows the Nyquist plots of the AC impedance for commercial Si and N-doped Si nanoparticles electrodes. The charge transfer impedance in the electrode/electrolyte interface can be estimated by the diameter of the semicircle in the high frequency range.<sup>1</sup> Obviously, the commercial Si electrode shows considerably higher layer resistance than that of the N-doped Si nanoparticles electrode, which indicates that the as-prepared Si benefits the electron transfer during electrochemical reaction.

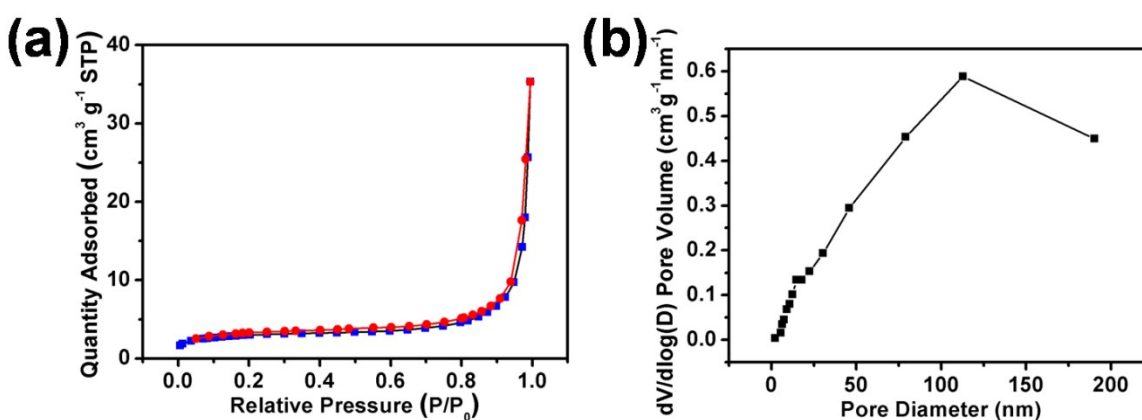

**Fig. S8. (a) Nitrogen adsorption curves, and (b) BJH pore diameter distribution of the as-prepared N-doped Si nanoparticles.**

The BET surface area of the N-doped Si nanoparticle is 10.59 m<sup>2</sup> g<sup>-1</sup>. The N<sub>2</sub> adsorption-desorption isotherms of the N-doped Si nanoparticle is shown in Fig. S7. Refer to the SEM, TEM images of the prepared N-doped Si sample, the pore structure of N-doped Si nanoparticles could be attributed to the aggregated distribution of the nanoparticles.

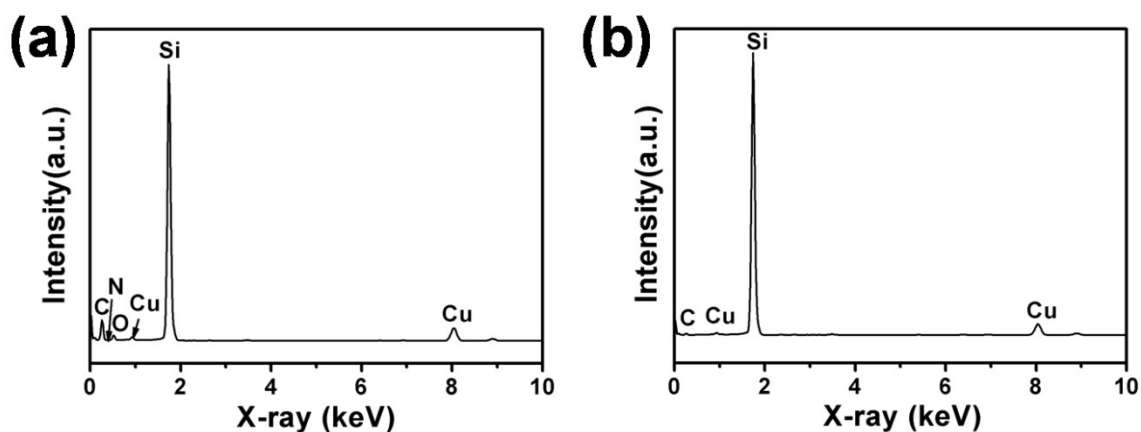

**Fig. S9. EDX spectrums of (a) N-doped Si nanoparticles, and (b) Si particles obtained under the similar conditions without the addition of Mg particles.**

As shown in Fig. S8a, the EDX spectrum of the prepared N-doped Si nanoparticles indicates that the  $\text{Mg}_3\text{N}_2$  is not left in the sample after acid treatment.

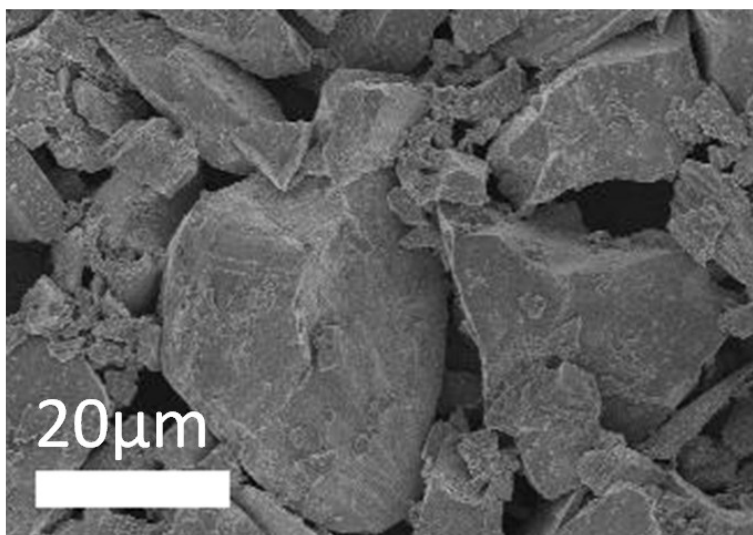

**Fig. S10. SEM of the Si particles obtained under the similar conditions without the addition of Mg particles.**

The sample has the similar size with the commercial Si.



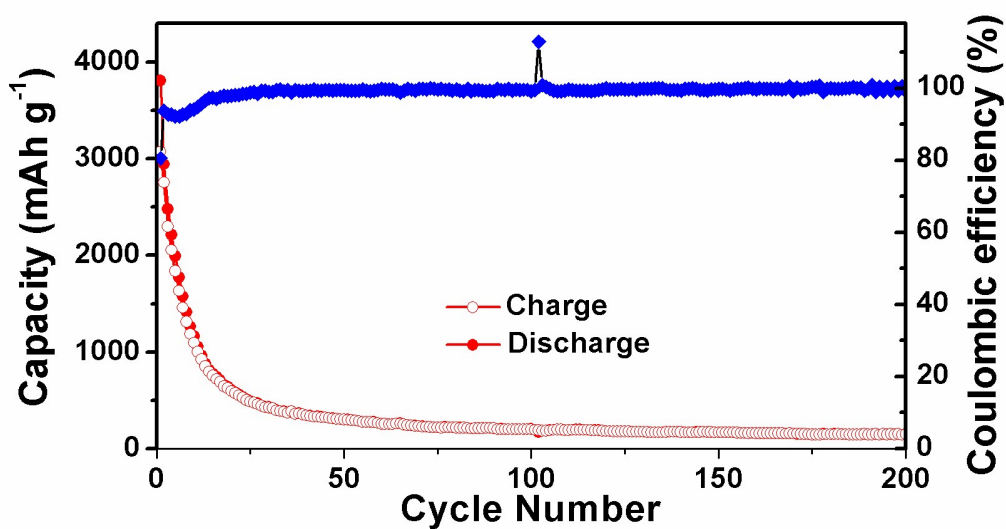

Fig. S11. The long term cycling properties of the Si particles obtained under the similar conditions without the addition of Mg particles.

The cycling behavior is measured at a current density of  $0.36 \text{ A g}^{-1}$  (Fig. S9), the Si anode displays a specific capacity about  $148 \text{ mAh g}^{-1}$  after 200 cycles.

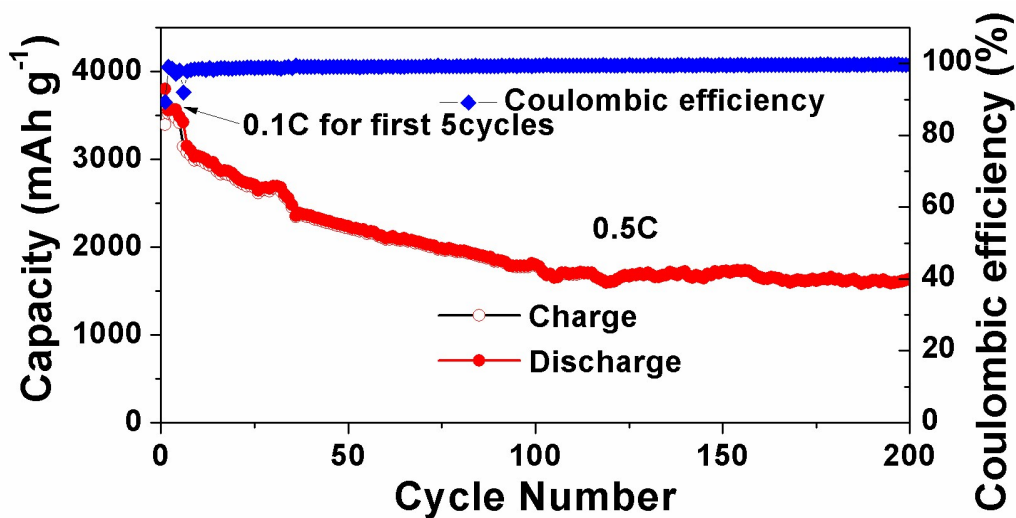

Fig. S12. The long term cycling properties of the N-doped Si nanoparticles in enlarged experiments.

The long term cycling behavior is measured at a current density of  $1.8 \text{ A g}^{-1}$  (Fig. S8), the N-doped Si anode displays a specific capacity about  $1580 \text{ mAh g}^{-1}$  after 200 cycles, which is showed excellent cyclic performance. It must be mentioned that the first five cycles of the cells are tested at a relative low current density of  $0.36 \text{ A g}^{-1}$  to activate Si nanoparticles sufficiently.

#### **Notes and references**

1. S. L. Chou, J. Z. Wang, M. Choucair, H. K. Liu, J. A. Stride and S. X. Dou, *Electrochem. Commun.*, 2010, **12**, 303–306.
